# Supplementary material
Source: PubMed Central journal article supplement (PMC4426401)
Supplement: pnas.201412165SI.pdf [file pnas.201412165SI.pdf]

# Supporting Information

Dao et al. 10.1073/pnas.1412165112

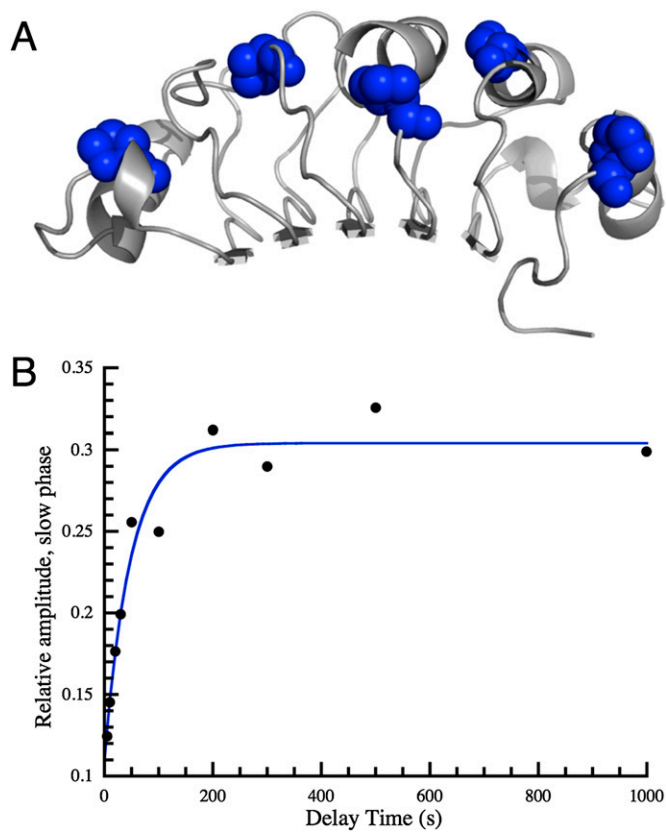

**Fig. S1.** *Cis-trans* prolyl isomerization during the refolding of PP32. (A) Ribbon representation of PP32. Residues P16, P60, P88, P108, and P140 are shown in blue spheres. (B) Double-jump refolding assay for PP32. PP32 was unfolded in 4 M urea, and was refolded after various delay times by dilution to a final urea concentration of 2 M. The relative amplitude is the fitted fluorescence change associated with the slow phase compared with the total refolding amplitude at each delay time. Line results from fitting a single-exponential model to the refolding amplitude.

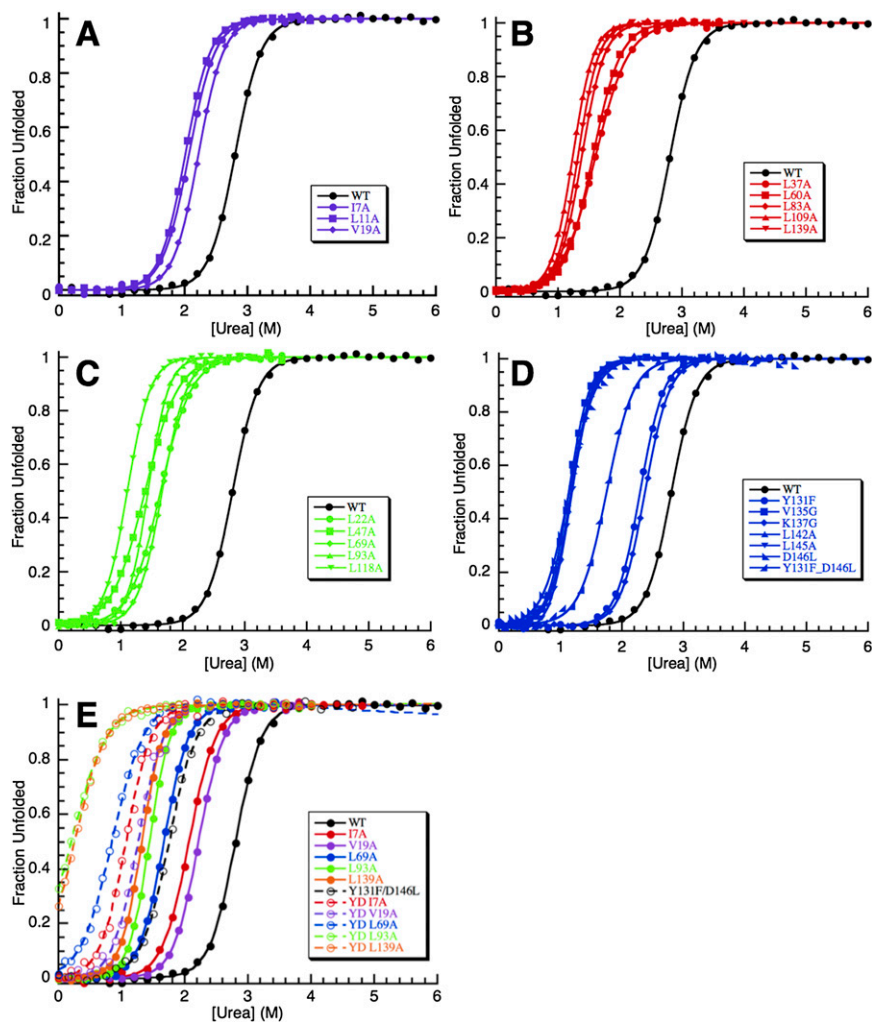

**Fig. S2.** Urea-induced equilibrium unfolding of PP32 variants. Transitions are monitored by far-UV CD at 220 nm. Lines result from fitting an equilibrium two-state unfolding model to the data. In each panel, WT PP32 is shown in black. (A) N-cap variants (purple), (B) conserved convex side L→A variants (red), (C) conserved  $\beta$ -sheet L→A variants (green), (D) C-cap variants (blue), and (E) a comparison between variants in WT (closed symbols) and YD (open symbol) backgrounds. The wild-type unfolding transitions, along with a subset of the single variant unfolding transitions (in panels B, C, and D), are adapted from ref. 1.

1. Dao TP, Majumdar A, Barrick D (2014) Capping motifs stabilize the leucine-rich repeat protein PP32 and rigidify adjacent repeats. *Protein Sci* 23(6):801–11.

**Table S1.** Fitted values for the Gaussian cosine equation

| Parameter        | Fitted value  | Confidence intervals |
|------------------|---------------|----------------------|
| $a$              | 1,510         | 900–2,120            |
| $\mu$            | 114 residues  | 91–139               |
| $\sigma$         | 104 residues  | 60–149               |
| $b$              | −0.72         | −1.1 to −0.38        |
| $n_{\text{rep}}$ | 22.6 residues | 21.6–23.6            |
| $c$              | −8.7 residues | −13.4 to −4.0        |

Parameters are as defined in Eq. 1 in main text. Parameters were fit using nonlinear least-squares optimization in Mathematica. Protection factors from the N-terminal  $\alpha$ -helical cap were not included in the fit.
